# Supplementary material for: A simple and reliable calibration method for direct analysis of ground-roasted coffee by portable XRF: an accurate analytical tool for total diet studies
Source: Royal Society of Chemistry journal article supplement (doi:10.1039/d3ja00299c), 2024-01-01
Supplement: d3ja00299c1.pdf [file d3ja00299c1.pdf]

Supplementary Material for:

**A simple and reliable calibration method for direct analysis of ground-roasted coffee by portable XRF: an accurate analytical tool for Total Diet Studies**

Nayza Ferreira Santos<sup>1</sup>, Luiz Roberto Guimarães Guilherme<sup>2</sup>, Marco Aurélio Carbone Carneiro<sup>2</sup>, Marcelo Braga Bueno Guerra<sup>1\*</sup>

<sup>1</sup>Department of Chemistry, Federal University of Lavras (UFLA), Campus Universitário, Lavras 37203-202, MG, Brazil.

<sup>2</sup>Department of Soil Science, Federal University of Lavras (UFLA), Campus Universitário, Lavras 37203-202, MG, Brazil.

**\*Corresponding author:** Marcelo Braga Bueno Guerra

e-mail: [marcelo.guerra@ufla.br](mailto:marcelo.guerra@ufla.br)

Phone: + 55 35 2142-208

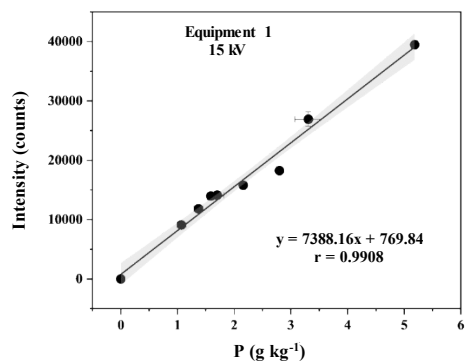

**Figure S1** - Calibration curve using CRM for P determination by pXRF (equipment 1 at 15 kV and 16.2  $\mu$ A).

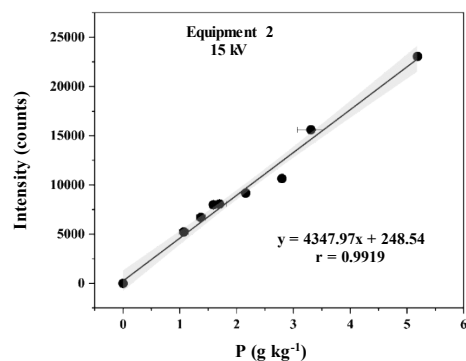

**Figure S2** - Calibration curve using CRM for P determination by pXRF (equipment 2 at 15 kV and 16.2  $\mu$ A).

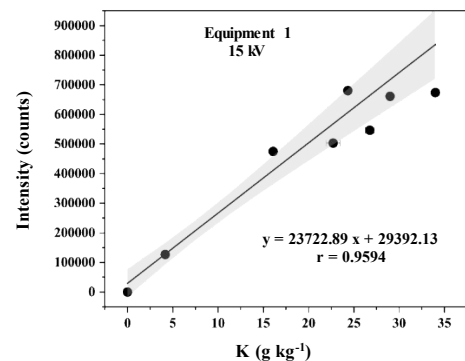

**Figure S3** - Calibration curve using CRM for K determination by pXRF (equipment 1 at 15 kV and 16.2  $\mu$ A).

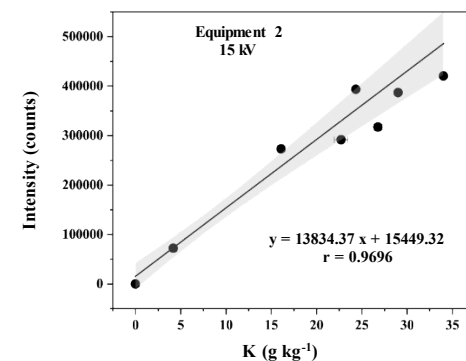

**Figure S4** - Calibration curve using CRM for K determination by pXRF (equipment 2 at 15 kV and 16.2  $\mu$ A).

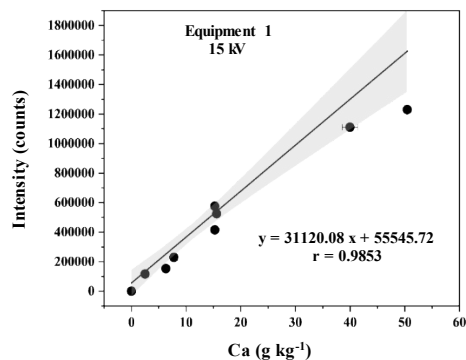

**Figure S5** - Calibration curve using CRM for Ca determination by pXRF (equipment 1 at 15 kV and 16.2  $\mu$ A).

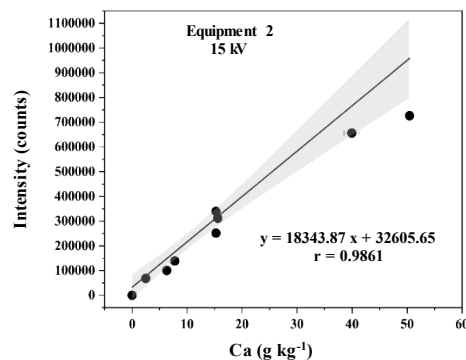

**Figure S6** - Calibration curve using CRM for Ca determination by pXRF (equipment 2 at 15 kV and 16.2  $\mu$ A).

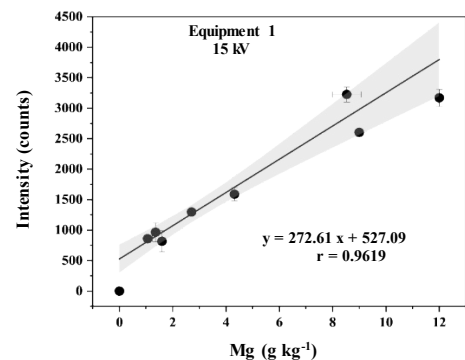

**Figure S7** - Calibration curve using CRM for Mg determination by pXRF (equipment 1 at 15 kV and 16.2  $\mu$ A).

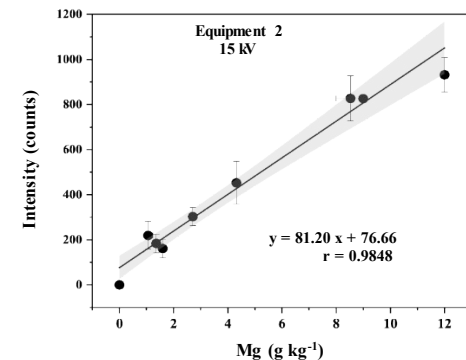

**Figure S8** - Calibration curve using CRM for Mg determination by pXRF (equipment 2 at 15 kV and 16.2  $\mu$ A).

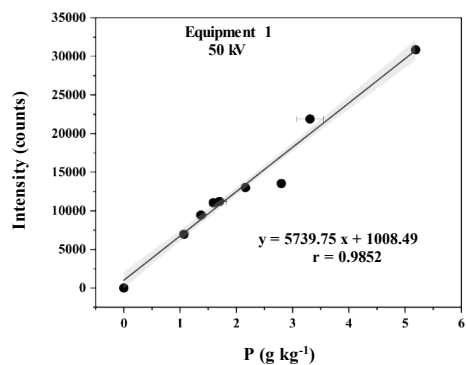

**Figure S9** - Calibration curve using CRM for P determination by pXRF (equipment 1 at 50 kV and 15.8  $\mu$ A).

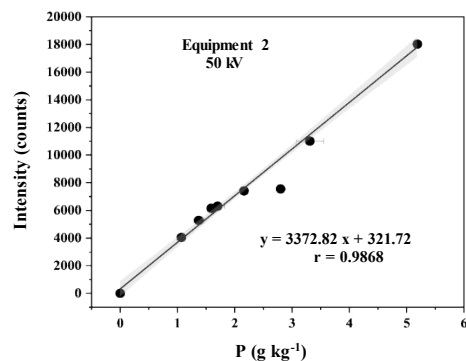

**Figure S10** - Calibration curve using CRM for P determination by pXRF (equipment 2 at 50 kV and 15.8  $\mu$ A).

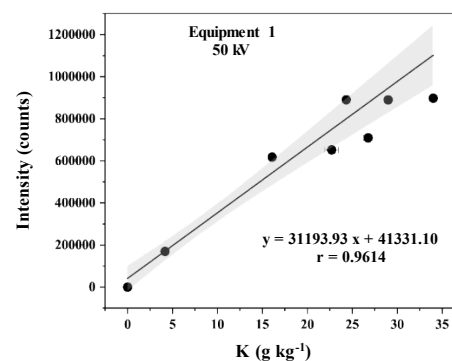

**Figure S11** - Calibration curve using CRM for K determination by pXRF (equipment 1 at 50 kV and 15.8  $\mu$ A).

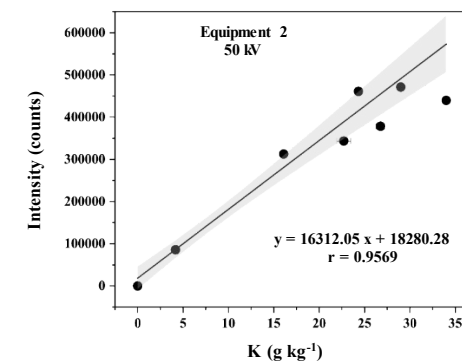

**Figure S12** - Calibration curve using CRM for K determination by pXRF (equipment 2 at 50 kV and 15.8  $\mu$ A).

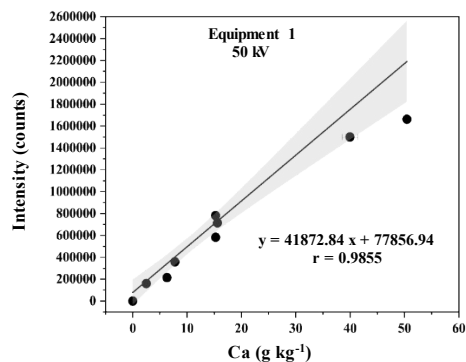

**Figure S13** - Calibration curve using CRM for Ca determination by pXRF (equipment 1 at 50 kV and 15.8  $\mu$ A).

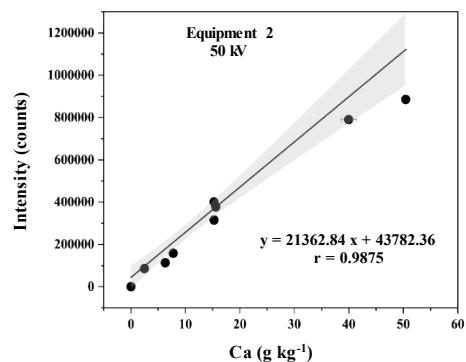

**Figure S14** - Calibration curve using CRM for Ca determination by pXRF (equipment 2 at 50 kV and 15.8  $\mu$ A).

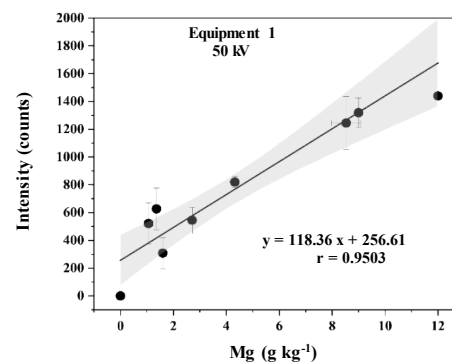

**Figure S15** - Calibration curve using CRM for Mg determination by pXRF (equipment 1 at 50 kV and 15.8  $\mu$ A).

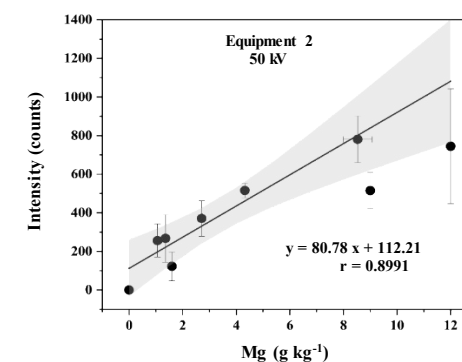

**Figure S16** - Calibration curve using CRM for Mg determination by pXRF (equipment 2 at 50 kV and 15.8  $\mu$ A).

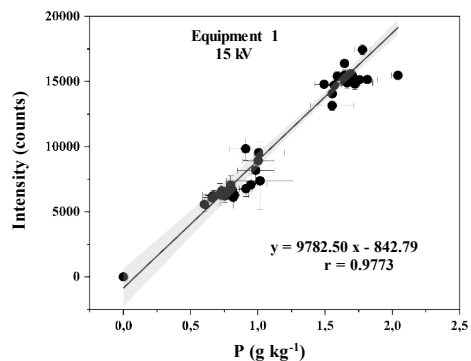

**Figure S17** - Calibration curve using ICP OES data for P determination by pXRF (equipment 1 at 15 kV and 16.2  $\mu$ A).

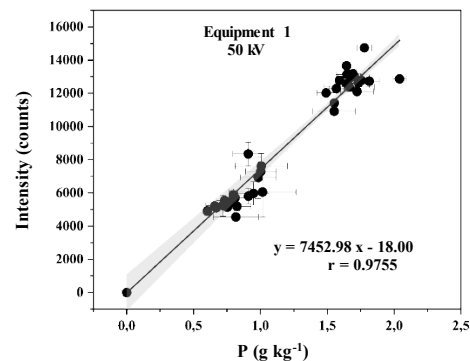

**Figure S18** - Calibration curve using ICP OES data for P determination by pXRF (equipment 1 at 50 kV and 15.8  $\mu$ A).

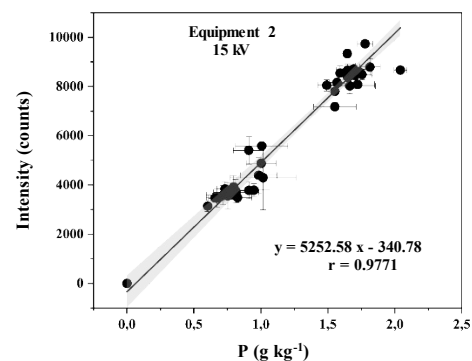

**Figure S19** - Calibration curve using ICP OES data for P determination by pXRF (equipment 2 at 15 kV and 16.2  $\mu$ A).

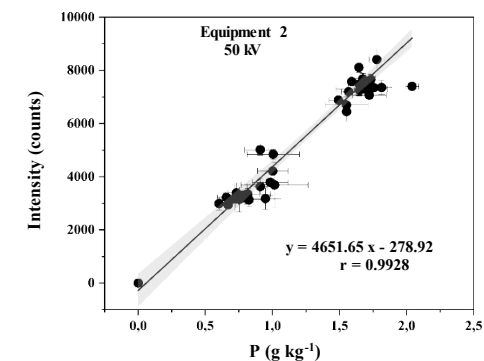

**Figure S20** - Calibration curve using ICP OES data for P determination by pXRF (equipment 2 at 50 kV and 15.8  $\mu$ A).

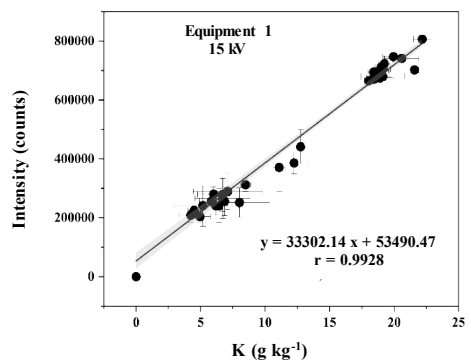

**Figure S21** - Calibration curve using ICP OES data for K determination by pXRF (equipment 1 at 15 kV and 16.2  $\mu$ A).

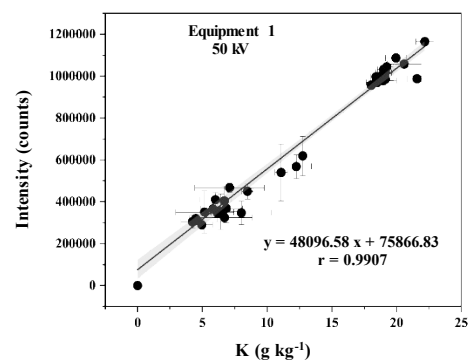

**Figure S22** - Calibration curve using ICP OES data for K determination by pXRF (equipment 1 at 50 kV and 15.8  $\mu$ A).

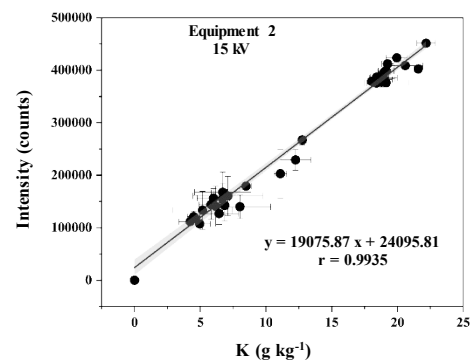

**Figure S23** - Calibration curve using ICP OES data for K determination by pXRF (equipment 2 at 15 kV and 16.2  $\mu$ A).

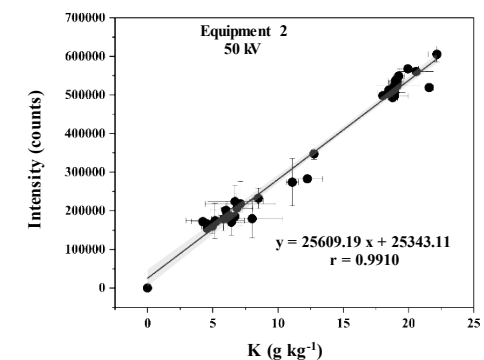

**Figure S24** - Calibration curve using ICP OES data for K determination by pXRF (equipment 2 at 50 kV and 15.8  $\mu$ A).
